# Supplementary material
Source: publisher figshare collection journal article supplement (https://acs.figshare.com/ndownloader/files/4776205)
Supplement: Supplementary file 1 [file 4776205]

 
data_sl05 
 
_audit_creation_method            SHELXL-97 
_chemical_name_systematic 
; 
 ? 
; 
_chemical_name_common             ? 
_chemical_melting_point           ? 
_chemical_formula_moiety          ? 
_chemical_formula_sum 
 'C15 H11 N O10 Re2' 
_chemical_formula_weight          737.65 
 
loop_ 
 _atom_type_symbol 
 _atom_type_description 
 _atom_type_scat_dispersion_real 
 _atom_type_scat_dispersion_imag 
 _atom_type_scat_source 
 'C'  'C'   0.0033   0.0016 
 'International Tables Vol C Tables 4.2.6.8 and 6.1.1.4' 
 'H'  'H'   0.0000   0.0000 
 'International Tables Vol C Tables 4.2.6.8 and 6.1.1.4' 
 'N'  'N'   0.0061   0.0033 
 'International Tables Vol C Tables 4.2.6.8 and 6.1.1.4' 
 'O'  'O'   0.0106   0.0060 
 'International Tables Vol C Tables 4.2.6.8 and 6.1.1.4' 
 'Re'  'Re'  -1.0185   7.2310 
 'International Tables Vol C Tables 4.2.6.8 and 6.1.1.4' 
 
_symmetry_cell_setting            triclinic
_symmetry_space_group_name_H-M    P-1
 
loop_ 
 _symmetry_equiv_pos_as_xyz 
 'x, y, z' 
 '-x, -y, -z' 
 
_cell_length_a                    9.116(2) 
_cell_length_b                    9.691(4) 
_cell_length_c                    11.606(3) 
_cell_angle_alpha                 84.11(4) 
_cell_angle_beta                  84.02(3) 
_cell_angle_gamma                 82.64(3) 
_cell_volume                      1007.2(5) 
_cell_formula_units_Z             2 
_cell_measurement_temperature     298(2) 
_cell_measurement_reflns_used     50
_cell_measurement_theta_min       10
_cell_measurement_theta_max       16
 
_exptl_crystal_description        needles
_exptl_crystal_colour             yellow
_exptl_crystal_size_max           0.40 
_exptl_crystal_size_mid           0.30 
_exptl_crystal_size_min           0.30 
_exptl_crystal_density_meas       ? 
_exptl_crystal_density_diffrn     2.432 
_exptl_crystal_density_method     'not measured' 
_exptl_crystal_F_000              676 
_exptl_absorpt_coefficient_mu     12.058 
_exptl_absorpt_correction_type    no
_exptl_absorpt_correction_T_min   ? 
_exptl_absorpt_correction_T_max   ?
_exptl_absorpt_process_details    ? 
 
_exptl_special_details 
; 
 ? 
; 
 
_diffrn_ambient_temperature       298(1) 
_diffrn_radiation_wavelength      0.71073 
_diffrn_radiation_type            MoK\a 
_diffrn_radiation_source          'fine-focus sealed tube' 
_diffrn_radiation_monochromator   graphite 
_diffrn_measurement_device_type   KUMA KM4
_diffrn_measurement_method        'omega/two-theta'
_diffrn_detector_area_resol_mean  ? 
_diffrn_standards_number          3
_diffrn_standards_interval_count  100
_diffrn_standards_interval_time   ? 
_diffrn_standards_decay_%         0
_diffrn_reflns_number             3625 
_diffrn_reflns_av_R_equivalents   0.0191 
_diffrn_reflns_av_sigmaI/netI     0.0205 
_diffrn_reflns_limit_h_min        0 
_diffrn_reflns_limit_h_max        10 
_diffrn_reflns_limit_k_min        -11 
_diffrn_reflns_limit_k_max        11 
_diffrn_reflns_limit_l_min        -13 
_diffrn_reflns_limit_l_max        13 
_diffrn_reflns_theta_min          2.13 
_diffrn_reflns_theta_max          25.05 
_reflns_number_total              3493 
_reflns_number_gt                 2729 
_reflns_threshold_expression      >2sigma(I) 
 
_computing_data_collection        'KUMA KM4 software'
_computing_cell_refinement        'KUMA KM4 software'
_computing_data_reduction         'KUMA KM4 software'
_computing_structure_solution     'SHELXS-97 (Sheldrick, 1990)' 
_computing_structure_refinement   'SHELXL-97 (Sheldrick, 1997)' 
_computing_molecular_graphics     ? 
_computing_publication_material   'SHELXL-97 (Sheldrick, 1997)'
 
_refine_special_details 
; 
 Refinement of F^2^ against ALL reflections.  The weighted R-factor wR and 
 goodness of fit S are based on F^2^, conventional R-factors R are based 
 on F, with F set to zero for negative F^2^. The threshold expression of 
 F^2^ > 2sigma(F^2^) is used only for calculating R-factors(gt) etc. and is 
 not relevant to the choice of reflections for refinement.  R-factors based 
 on F^2^ are statistically about twice as large as those based on F, and R- 
 factors based on ALL data will be even larger. 
; 
 
_refine_ls_structure_factor_coef  Fsqd  
_refine_ls_matrix_type            full 
_refine_ls_weighting_scheme       calc  
_refine_ls_weighting_details 
 'calc w=1/[\s^2^(Fo^2^)+(0.0470P)^2^+0.0000P] where P=(Fo^2^+2Fc^2^)/3' 
_atom_sites_solution_primary      direct 
_atom_sites_solution_secondary    difmap 
_atom_sites_solution_hydrogens    geom 
_refine_ls_hydrogen_treatment     mixed 
_refine_ls_extinction_method      none 
_refine_ls_extinction_coef        ? 
_refine_ls_number_reflns          3493 
_refine_ls_number_parameters      253 
_refine_ls_number_restraints      0 
_refine_ls_R_factor_all           0.0459 
_refine_ls_R_factor_gt            0.0296 
_refine_ls_wR_factor_ref          0.0921 
_refine_ls_wR_factor_gt           0.0872 
_refine_ls_goodness_of_fit_ref    1.446 
_refine_ls_restrained_S_all       1.446 
_refine_ls_shift/su_max           0.001 
_refine_ls_shift/su_mean          0.000 
 
loop_ 
 _atom_site_label 
 _atom_site_type_symbol 
 _atom_site_fract_x 
 _atom_site_fract_y 
 _atom_site_fract_z 
 _atom_site_U_iso_or_equiv 
 _atom_site_adp_type 
 _atom_site_occupancy 
 _atom_site_symmetry_multiplicity 
 _atom_site_calc_flag 
 _atom_site_refinement_flags 
 _atom_site_disorder_assembly 
 _atom_site_disorder_group 
Re1 Re 0.20924(3) 0.20027(3) 0.29355(2) 0.04019(12) Uani 1 1 d . . . 
Re2 Re 0.22871(3) 0.50518(3) 0.19882(2) 0.04291(12) Uani 1 1 d . . . 
N N 0.3047(8) 0.1483(7) 0.7045(6) 0.0555(17) Uani 1 1 d . . . 
O1 O 0.1721(13) -0.1025(9) 0.3863(8) 0.115(3) Uani 1 1 d . . . 
O2 O 0.4309(8) 0.1228(8) 0.0783(6) 0.084(2) Uani 1 1 d . . . 
O3 O -0.0429(7) 0.2108(9) 0.1325(6) 0.086(2) Uani 1 1 d . . . 
O4 O -0.0036(7) 0.3291(7) 0.4913(5) 0.0734(19) Uani 1 1 d . . . 
O5 O 0.2350(12) 0.8142(9) 0.1079(9) 0.115(3) Uani 1 1 d . . . 
O6 O 0.3216(8) 0.5331(8) 0.4461(6) 0.078(2) Uani 1 1 d . . . 
O7 O 0.5642(8) 0.4278(9) 0.1205(6) 0.088(2) Uani 1 1 d . . . 
O8 O 0.1612(7) 0.4065(8) -0.0325(6) 0.0738(18) Uani 1 1 d . . . 
O9 O -0.1060(7) 0.5491(8) 0.2861(6) 0.0746(19) Uani 1 1 d . . . 
O10 O 0.5240(5) 0.2222(6) 0.3184(4) 0.0519(13) Uani 1 1 d . . . 
C1 C 0.1868(10) 0.0128(9) 0.3489(8) 0.061(2) Uani 1 1 d . . . 
C2 C 0.3514(10) 0.1542(9) 0.1575(7) 0.054(2) Uani 1 1 d . . . 
C3 C 0.0477(10) 0.2101(9) 0.1928(7) 0.056(2) Uani 1 1 d . . . 
C4 C 0.0724(9) 0.2829(9) 0.4194(7) 0.0504(19) Uani 1 1 d . . . 
C5 C 0.2314(12) 0.7031(11) 0.1410(9) 0.071(3) Uani 1 1 d . . . 
C6 C 0.2861(9) 0.5219(9) 0.3593(8) 0.0531(19) Uani 1 1 d . . . 
C7 C 0.4433(9) 0.4524(9) 0.1501(7) 0.055(2) Uani 1 1 d . . . 
C8 C 0.1835(9) 0.4440(9) 0.0498(7) 0.052(2) Uani 1 1 d . . . 
C9 C 0.0135(9) 0.5336(9) 0.2559(7) 0.0503(19) Uani 1 1 d . . . 
C10 C 0.4022(8) 0.2036(8) 0.3903(6) 0.0431(16) Uani 1 1 d . . . 
C11 C 0.6615(9) 0.2392(12) 0.3587(9) 0.071(3) Uani 1 1 d . . . 
H11 H 0.7426 0.2530 0.2850 0.085 Uiso 1 1 d R . . 
H111 H 0.6476 0.3303 0.4069 0.085 Uiso 1 1 d R . . 
H112 H 0.6992 0.1481 0.4143 0.085 Uiso 1 1 d R . . 
C12 C 0.4175(8) 0.1952(8) 0.5058(6) 0.0463(17) Uani 1 1 d . . . 
H12 H 0.5200 0.2196 0.5335 0.056 Uiso 1 1 d R . . 
C13 C 0.3052(9) 0.1550(7) 0.5913(6) 0.0465(17) Uani 1 1 d . . . 
H13 H 0.2085 0.1237 0.5593 0.056 Uiso 1 1 d R . . 
C14 C 0.1884(12) 0.0975(12) 0.7822(8) 0.077(3) Uani 1 1 d . . . 
H14 H 0.1085 0.0632 0.7323 0.092 Uiso 1 1 d R . . 
H141 H 0.2315 0.0113 0.8406 0.092 Uiso 1 1 d R . . 
H142 H 0.1353 0.1814 0.8319 0.092 Uiso 1 1 d R . . 
C15 C 0.4247(12) 0.1961(12) 0.7582(9) 0.077(3) Uani 1 1 d . . . 
H15 H 0.5056 0.2286 0.6893 0.093 Uiso 1 1 d R . . 
H151 H 0.3808 0.2839 0.8068 0.093 Uiso 1 1 d R . . 
H152 H 0.4770 0.1138 0.8155 0.093 Uiso 1 1 d R . . 
 
loop_ 
 _atom_site_aniso_label 
 _atom_site_aniso_U_11 
 _atom_site_aniso_U_22 
 _atom_site_aniso_U_33 
 _atom_site_aniso_U_23 
 _atom_site_aniso_U_13 
 _atom_site_aniso_U_12 
Re1 0.04609(19) 0.0449(2) 0.03233(19) -0.00768(13) -0.00026(12) -0.01524(13) 
Re2 0.0497(2) 0.0469(2) 0.03386(19) -0.00493(14) 0.00029(13) -0.01509(14) 
N 0.076(5) 0.060(4) 0.034(4) -0.006(3) -0.005(3) -0.016(3) 
O1 0.182(10) 0.070(5) 0.105(7) 0.015(5) -0.037(6) -0.060(6) 
O2 0.097(5) 0.096(5) 0.057(4) -0.030(4) 0.020(4) -0.003(4) 
O3 0.063(4) 0.128(6) 0.077(5) 0.005(4) -0.029(4) -0.043(4) 
O4 0.083(4) 0.079(5) 0.051(4) -0.012(3) 0.032(3) -0.007(3) 
O5 0.164(9) 0.061(5) 0.120(8) 0.027(5) -0.024(7) -0.034(5) 
O6 0.096(5) 0.091(5) 0.055(4) -0.019(4) -0.029(4) -0.015(4) 
O7 0.061(4) 0.124(6) 0.072(5) 0.018(4) 0.015(3) -0.016(4) 
O8 0.081(4) 0.094(5) 0.049(4) -0.018(3) -0.003(3) -0.012(4) 
O9 0.054(4) 0.104(5) 0.058(4) -0.003(3) 0.006(3) 0.008(3) 
O10 0.043(3) 0.075(4) 0.039(3) -0.011(3) 0.001(2) -0.012(3) 
C1 0.073(6) 0.057(6) 0.058(5) -0.011(4) -0.009(4) -0.020(4) 
C2 0.071(5) 0.057(5) 0.039(4) -0.012(4) -0.006(4) -0.016(4) 
C3 0.059(5) 0.067(5) 0.044(5) -0.007(4) 0.005(4) -0.027(4) 
C4 0.057(5) 0.056(5) 0.040(4) 0.002(4) -0.001(4) -0.019(4) 
C5 0.093(7) 0.060(6) 0.056(6) 0.011(5) -0.001(5) -0.017(5) 
C6 0.057(5) 0.055(5) 0.050(5) -0.011(4) -0.006(4) -0.013(4) 
C7 0.048(5) 0.070(6) 0.047(5) 0.001(4) 0.001(4) -0.014(4) 
C8 0.052(5) 0.076(6) 0.033(4) -0.017(4) 0.002(3) -0.019(4) 
C9 0.053(5) 0.063(5) 0.035(4) -0.010(4) -0.003(3) -0.003(4) 
C10 0.048(4) 0.043(4) 0.041(4) -0.007(3) 0.001(3) -0.013(3) 
C11 0.043(4) 0.106(8) 0.070(6) -0.021(5) -0.004(4) -0.019(5) 
C12 0.045(4) 0.058(5) 0.039(4) -0.011(3) -0.013(3) -0.003(3) 
C13 0.065(5) 0.038(4) 0.041(4) -0.008(3) -0.014(3) -0.012(3) 
C14 0.091(7) 0.098(8) 0.045(5) 0.002(5) -0.002(5) -0.038(6) 
C15 0.079(7) 0.108(9) 0.051(6) -0.023(5) -0.010(5) -0.016(6) 
 
_geom_special_details 
; 
 All esds (except the esd in the dihedral angle between two l.s. planes) 
 are estimated using the full covariance matrix.  The cell esds are taken 
 into account individually in the estimation of esds in distances, angles 
 and torsion angles; correlations between esds in cell parameters are only 
 used when they are defined by crystal symmetry.  An approximate (isotropic) 
 treatment of cell esds is used for estimating esds involving l.s. planes. 
; 
 
loop_ 
 _geom_bond_atom_site_label_1 
 _geom_bond_atom_site_label_2 
 _geom_bond_distance 
 _geom_bond_site_symmetry_2 
 _geom_bond_publ_flag 
Re1 C1 1.893(9) . ? 
Re1 C3 1.961(9) . ? 
Re1 C4 1.983(9) . ? 
Re1 C2 1.985(9) . ? 
Re1 C10 2.189(7) . ? 
Re1 Re2 3.0656(14) . ? 
Re2 C5 1.968(10) . ? 
Re2 C8 1.983(8) . ? 
Re2 C7 1.995(8) . ? 
Re2 C9 1.998(8) . ? 
Re2 C6 2.014(9) . ? 
N C13 1.308(10) . ? 
N C14 1.423(11) . ? 
N C15 1.459(11) . ? 
O1 C1 1.175(11) . ? 
O2 C2 1.151(10) . ? 
O3 C3 1.135(10) . ? 
O4 C4 1.120(9) . ? 
O5 C5 1.109(12) . ? 
O6 C6 1.110(10) . ? 
O7 C7 1.123(10) . ? 
O8 C8 1.103(9) . ? 
O9 C9 1.105(9) . ? 
O10 C10 1.337(8) . ? 
O10 C11 1.417(10) . ? 
C10 C12 1.355(10) . ? 
C11 H11 1.0800 . ? 
C11 H111 1.0800 . ? 
C11 H112 1.0801 . ? 
C12 C13 1.413(11) . ? 
C12 H12 1.0800 . ? 
C13 H13 1.0800 . ? 
C14 H14 1.0800 . ? 
C14 H141 1.0800 . ? 
C14 H142 1.0800 . ? 
C15 H15 1.0800 . ? 
C15 H151 1.0800 . ? 
C15 H152 1.0800 . ? 
 
loop_ 
 _geom_angle_atom_site_label_1 
 _geom_angle_atom_site_label_2 
 _geom_angle_atom_site_label_3 
 _geom_angle 
 _geom_angle_site_symmetry_1 
 _geom_angle_site_symmetry_3 
 _geom_angle_publ_flag 
C1 Re1 C3 92.0(4) . . ? 
C1 Re1 C4 95.0(4) . . ? 
C3 Re1 C4 91.7(3) . . ? 
C1 Re1 C2 95.7(4) . . ? 
C3 Re1 C2 88.3(3) . . ? 
C4 Re1 C2 169.3(3) . . ? 
C1 Re1 C10 93.1(3) . . ? 
C3 Re1 C10 173.6(3) . . ? 
C4 Re1 C10 91.8(3) . . ? 
C2 Re1 C10 87.3(3) . . ? 
C1 Re1 Re2 176.8(3) . . ? 
C3 Re1 Re2 84.9(3) . . ? 
C4 Re1 Re2 84.3(2) . . ? 
C2 Re1 Re2 85.1(2) . . ? 
C10 Re1 Re2 90.03(19) . . ? 
C5 Re2 C8 95.4(4) . . ? 
C5 Re2 C7 94.2(4) . . ? 
C8 Re2 C7 87.8(3) . . ? 
C5 Re2 C9 92.9(4) . . ? 
C8 Re2 C9 91.9(3) . . ? 
C7 Re2 C9 172.9(3) . . ? 
C5 Re2 C6 96.9(4) . . ? 
C8 Re2 C6 167.4(4) . . ? 
C7 Re2 C6 88.1(3) . . ? 
C9 Re2 C6 90.8(3) . . ? 
C5 Re2 Re1 177.3(3) . . ? 
C8 Re2 Re1 85.0(3) . . ? 
C7 Re2 Re1 88.5(2) . . ? 
C9 Re2 Re1 84.4(2) . . ? 
C6 Re2 Re1 83.0(2) . . ? 
C13 N C14 123.0(7) . . ? 
C13 N C15 121.0(7) . . ? 
C14 N C15 116.0(7) . . ? 
C10 O10 C11 122.7(6) . . ? 
O1 C1 Re1 178.2(9) . . ? 
O2 C2 Re1 177.2(8) . . ? 
O3 C3 Re1 177.1(9) . . ? 
O4 C4 Re1 179.2(8) . . ? 
O5 C5 Re2 179.0(11) . . ? 
O6 C6 Re2 177.8(8) . . ? 
O7 C7 Re2 177.2(8) . . ? 
O8 C8 Re2 177.9(8) . . ? 
O9 C9 Re2 179.1(7) . . ? 
O10 C10 C12 116.6(7) . . ? 
O10 C10 Re1 111.3(5) . . ? 
C12 C10 Re1 132.1(6) . . ? 
O10 C11 H11 109.2 . . ? 
O10 C11 H111 109.3 . . ? 
H11 C11 H111 109.5 . . ? 
O10 C11 H112 110.0 . . ? 
H11 C11 H112 109.5 . . ? 
H111 C11 H112 109.5 . . ? 
C10 C12 C13 122.6(7) . . ? 
C10 C12 H12 118.6 . . ? 
C13 C12 H12 118.8 . . ? 
N C13 C12 128.1(7) . . ? 
N C13 H13 115.8 . . ? 
C12 C13 H13 116.0 . . ? 
N C14 H14 109.0 . . ? 
N C14 H141 110.8 . . ? 
H14 C14 H141 109.5 . . ? 
N C14 H142 108.6 . . ? 
H14 C14 H142 109.5 . . ? 
H141 C14 H142 109.5 . . ? 
N C15 H15 107.8 . . ? 
N C15 H151 109.4 . . ? 
H15 C15 H151 109.5 . . ? 
N C15 H152 111.2 . . ? 
H15 C15 H152 109.5 . . ? 
H151 C15 H152 109.5 . . ? 
 
loop_ 
 _geom_torsion_atom_site_label_1 
 _geom_torsion_atom_site_label_2 
 _geom_torsion_atom_site_label_3 
 _geom_torsion_atom_site_label_4 
 _geom_torsion 
 _geom_torsion_site_symmetry_1 
 _geom_torsion_site_symmetry_2 
 _geom_torsion_site_symmetry_3 
 _geom_torsion_site_symmetry_4 
 _geom_torsion_publ_flag 
C1 Re1 Re2 C5 44(9) . . . . ? 
C3 Re1 Re2 C5 60(7) . . . . ? 
C4 Re1 Re2 C5 -33(7) . . . . ? 
C2 Re1 Re2 C5 148(7) . . . . ? 
C10 Re1 Re2 C5 -124(7) . . . . ? 
C1 Re1 Re2 C8 -53(5) . . . . ? 
C3 Re1 Re2 C8 -37.1(3) . . . . ? 
C4 Re1 Re2 C8 -129.3(3) . . . . ? 
C2 Re1 Re2 C8 51.7(3) . . . . ? 
C10 Re1 Re2 C8 139.0(3) . . . . ? 
C1 Re1 Re2 C7 -141(5) . . . . ? 
C3 Re1 Re2 C7 -125.0(4) . . . . ? 
C4 Re1 Re2 C7 142.8(3) . . . . ? 
C2 Re1 Re2 C7 -36.3(4) . . . . ? 
C10 Re1 Re2 C7 51.0(3) . . . . ? 
C1 Re1 Re2 C9 39(5) . . . . ? 
C3 Re1 Re2 C9 55.3(3) . . . . ? 
C4 Re1 Re2 C9 -36.9(3) . . . . ? 
C2 Re1 Re2 C9 144.0(3) . . . . ? 
C10 Re1 Re2 C9 -128.7(3) . . . . ? 
C1 Re1 Re2 C6 131(5) . . . . ? 
C3 Re1 Re2 C6 146.8(4) . . . . ? 
C4 Re1 Re2 C6 54.6(3) . . . . ? 
C2 Re1 Re2 C6 -124.5(3) . . . . ? 
C10 Re1 Re2 C6 -37.2(3) . . . . ? 
C3 Re1 C1 O1 -122(30) . . . . ? 
C4 Re1 C1 O1 -30(30) . . . . ? 
C2 Re1 C1 O1 150(30) . . . . ? 
C10 Re1 C1 O1 62(30) . . . . ? 
Re2 Re1 C1 O1 -106(29) . . . . ? 
C1 Re1 C2 O2 33(17) . . . . ? 
C3 Re1 C2 O2 -59(16) . . . . ? 
C4 Re1 C2 O2 -149(16) . . . . ? 
C10 Re1 C2 O2 126(17) . . . . ? 
Re2 Re1 C2 O2 -144(17) . . . . ? 
C1 Re1 C3 O3 -52(15) . . . . ? 
C4 Re1 C3 O3 -148(15) . . . . ? 
C2 Re1 C3 O3 43(15) . . . . ? 
C10 Re1 C3 O3 90(15) . . . . ? 
Re2 Re1 C3 O3 128(15) . . . . ? 
C1 Re1 C4 O4 74(53) . . . . ? 
C3 Re1 C4 O4 166(53) . . . . ? 
C2 Re1 C4 O4 -104(52) . . . . ? 
C10 Re1 C4 O4 -19(53) . . . . ? 
Re2 Re1 C4 O4 -109(53) . . . . ? 
C8 Re2 C5 O5 -87(63) . . . . ? 
C7 Re2 C5 O5 1(63) . . . . ? 
C9 Re2 C5 O5 -179(100) . . . . ? 
C6 Re2 C5 O5 90(63) . . . . ? 
Re1 Re2 C5 O5 177(100) . . . . ? 
C5 Re2 C6 O6 -53(21) . . . . ? 
C8 Re2 C6 O6 112(21) . . . . ? 
C7 Re2 C6 O6 41(21) . . . . ? 
C9 Re2 C6 O6 -146(21) . . . . ? 
Re1 Re2 C6 O6 130(21) . . . . ? 
C5 Re2 C7 O7 -8(18) . . . . ? 
C8 Re2 C7 O7 87(18) . . . . ? 
C9 Re2 C7 O7 175(16) . . . . ? 
C6 Re2 C7 O7 -105(18) . . . . ? 
Re1 Re2 C7 O7 172(18) . . . . ? 
C5 Re2 C8 O8 140(21) . . . . ? 
C7 Re2 C8 O8 46(21) . . . . ? 
C9 Re2 C8 O8 -127(21) . . . . ? 
C6 Re2 C8 O8 -25(22) . . . . ? 
Re1 Re2 C8 O8 -43(21) . . . . ? 
C5 Re2 C9 O9 84(54) . . . . ? 
C8 Re2 C9 O9 -11(54) . . . . ? 
C7 Re2 C9 O9 -99(54) . . . . ? 
C6 Re2 C9 O9 -179(100) . . . . ? 
Re1 Re2 C9 O9 -96(54) . . . . ? 
C11 O10 C10 C12 -3.0(11) . . . . ? 
C11 O10 C10 Re1 174.9(7) . . . . ? 
C1 Re1 C10 O10 116.3(6) . . . . ? 
C3 Re1 C10 O10 -26(3) . . . . ? 
C4 Re1 C10 O10 -148.6(5) . . . . ? 
C2 Re1 C10 O10 20.7(5) . . . . ? 
Re2 Re1 C10 O10 -64.3(5) . . . . ? 
C1 Re1 C10 C12 -66.2(8) . . . . ? 
C3 Re1 C10 C12 151(3) . . . . ? 
C4 Re1 C10 C12 28.9(8) . . . . ? 
C2 Re1 C10 C12 -161.8(8) . . . . ? 
Re2 Re1 C10 C12 113.2(7) . . . . ? 
O10 C10 C12 C13 -170.2(7) . . . . ? 
Re1 C10 C12 C13 12.4(12) . . . . ? 
C14 N C13 C12 -175.9(9) . . . . ? 
C15 N C13 C12 5.3(13) . . . . ? 
C10 C12 C13 N -177.1(8) . . . . ? 
 
_diffrn_measured_fraction_theta_max    0.978 
_diffrn_reflns_theta_full              25.05 
_diffrn_measured_fraction_theta_full   0.978 
_refine_diff_density_max    0.956 
_refine_diff_density_min   -1.810 
_refine_diff_density_rms    0.188 

#------------------------------------------------

_data_publication_text

_publ_requested_journal          '???????'
_publ_contact_author_name        'S\/awomir Szafert'
_publ_contact_author_address     
;
       address

_publ_contact_author_email       szaf@wchuwr.chem.uni.wroc.pl
_publ_contact_author_phone       +48-(0)-71-375-73-78

loop
_publ_author_name
_publ_author_address


       ''Karolina Osowska''
       Faculty of Chemistry
       University of Wroc\/aw
       14 Joliot-Curie St
       50-383 Wroc\/aw
       Poland

       ''Krzysztof Mierzwicki''
       Faculty of Chemistry
       University of Wroc\/aw
       14 Joliot-Curie St
       50-383 Wroc\/aw
       Poland

       ''S\/awomir Szafert''
       Faculty of Chemistry
       University of Wroc\/aw
       14 Joliot-Curie St
       50-383 Wroc\/aw
       Poland


;
_publ_author_letter
;
Please deposit this CIF in the Cambridge Crystallographic data Centre
;
########################################################

#--------------------------------------------------
